# Supplementary material for: The effect on ion channel of different protonation states of E90 in channelrhodopsin-2: a molecular dynamics simulation
Source: Royal Society of Chemistry journal article supplement (doi:10.1039/d1ra01879e), 2021-01-01
Supplement: d1ra01879e1.pdf [file d1ra01879e1.pdf]

## The effect of ion channel by different protonation states of E90 in Channelrhodopsin-2: Molecular Dynamics Simulation

Jie Cheng <sup>a</sup>, Wenying Zhang <sup>a</sup>, Shuangyan Zhou <sup>a</sup>, Xu Ran <sup>a</sup>, Yiwen Shang <sup>a</sup>, Glenn V. Lo <sup>b</sup>, Yusheng Dou <sup>b</sup>, Shuai Yuan\*<sup>a</sup>

a.Chongqing Key Laboratory of Big Data for Bio Intelligence, Chongqing University of Posts and Telecommunications, Chongqing 40065, China. E-mail:  
[zhangwenying@cqupt.edu.cn](mailto:zhangwenying@cqupt.edu.cn), [yuanshuai@cqupt.edu.cn](mailto:yuanshuai@cqupt.edu.cn)

b.Department of Chemistry and Physical Sciences, Nicholls State University, P.O. Box 2022, Thibodaux, LA 70310, USA

## Supporting Information

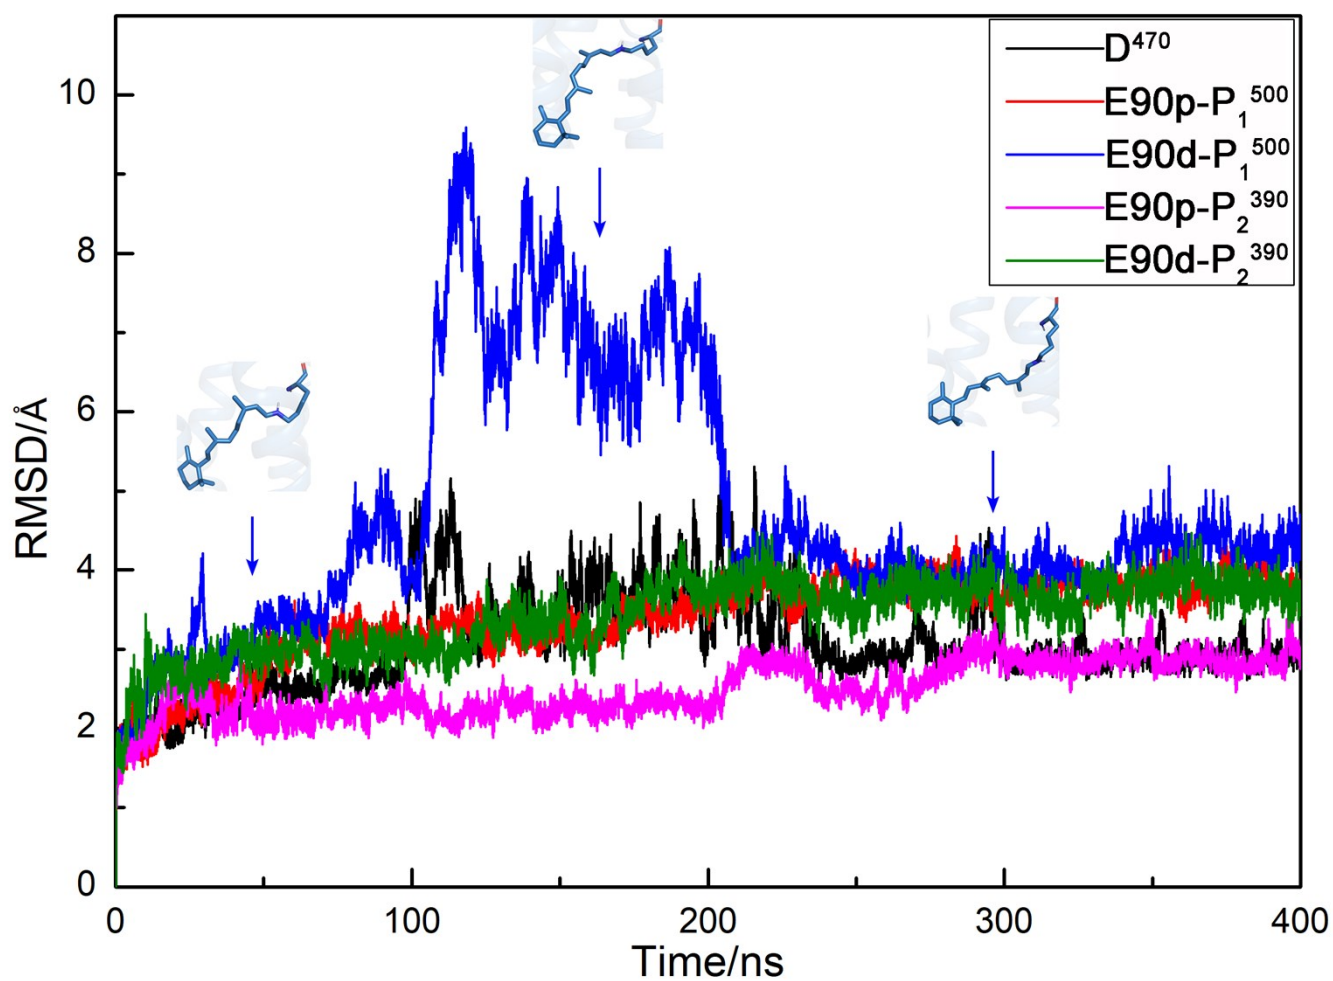

Fig. S1: Variations of root-mean-square deviation (RMSD) of skeleton atoms of channelrhodopsin-2 with time. The three diagrammatic drawings indicate the variation of retinal conformation in E90d-P<sub>1</sub><sup>500</sup> state. The strongly fluctuations of E90d-P<sub>1</sub><sup>500</sup> trajectory (blue curve) during 100 to 200 ns indicate the sharply conformational changes of polyene chain of retinal.

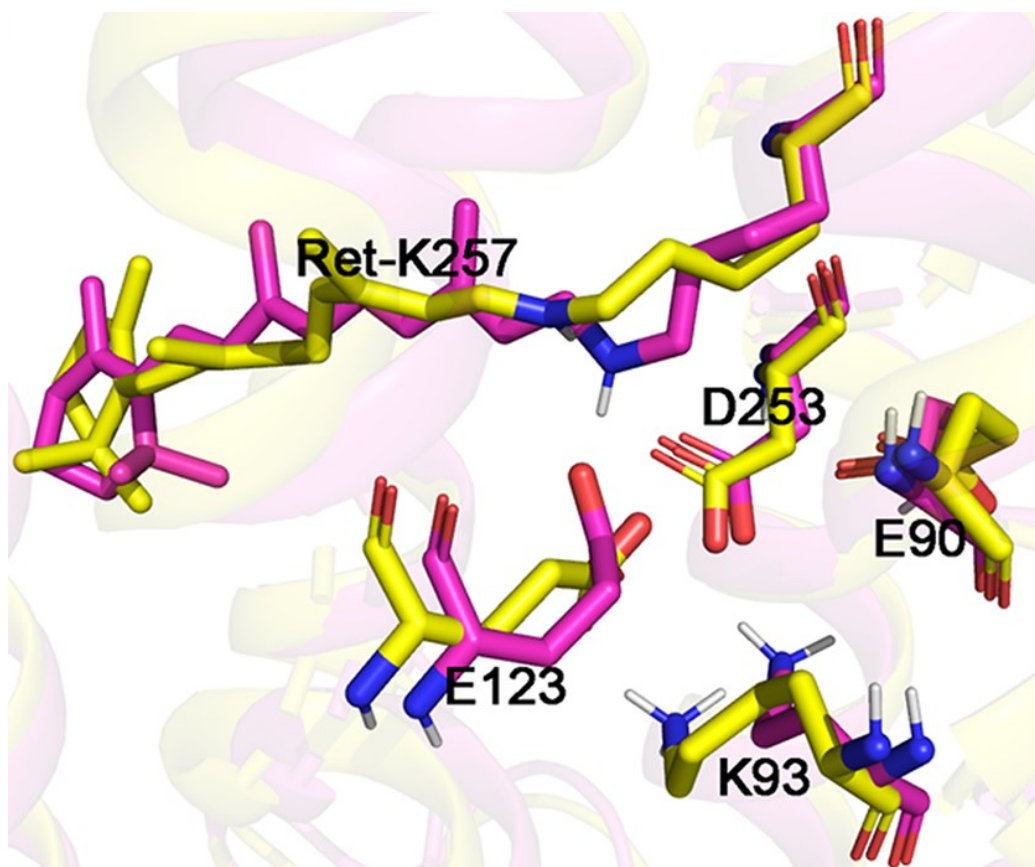

Fig. S2: The partially superimposed scheme of crystal structure of ChR2 (PDB ID: 6EID) and the structure of  $D^{470}$  state. Purple: the crystal structure of ChR2, yellow: indicates the structure of  $D^{470}$  state.

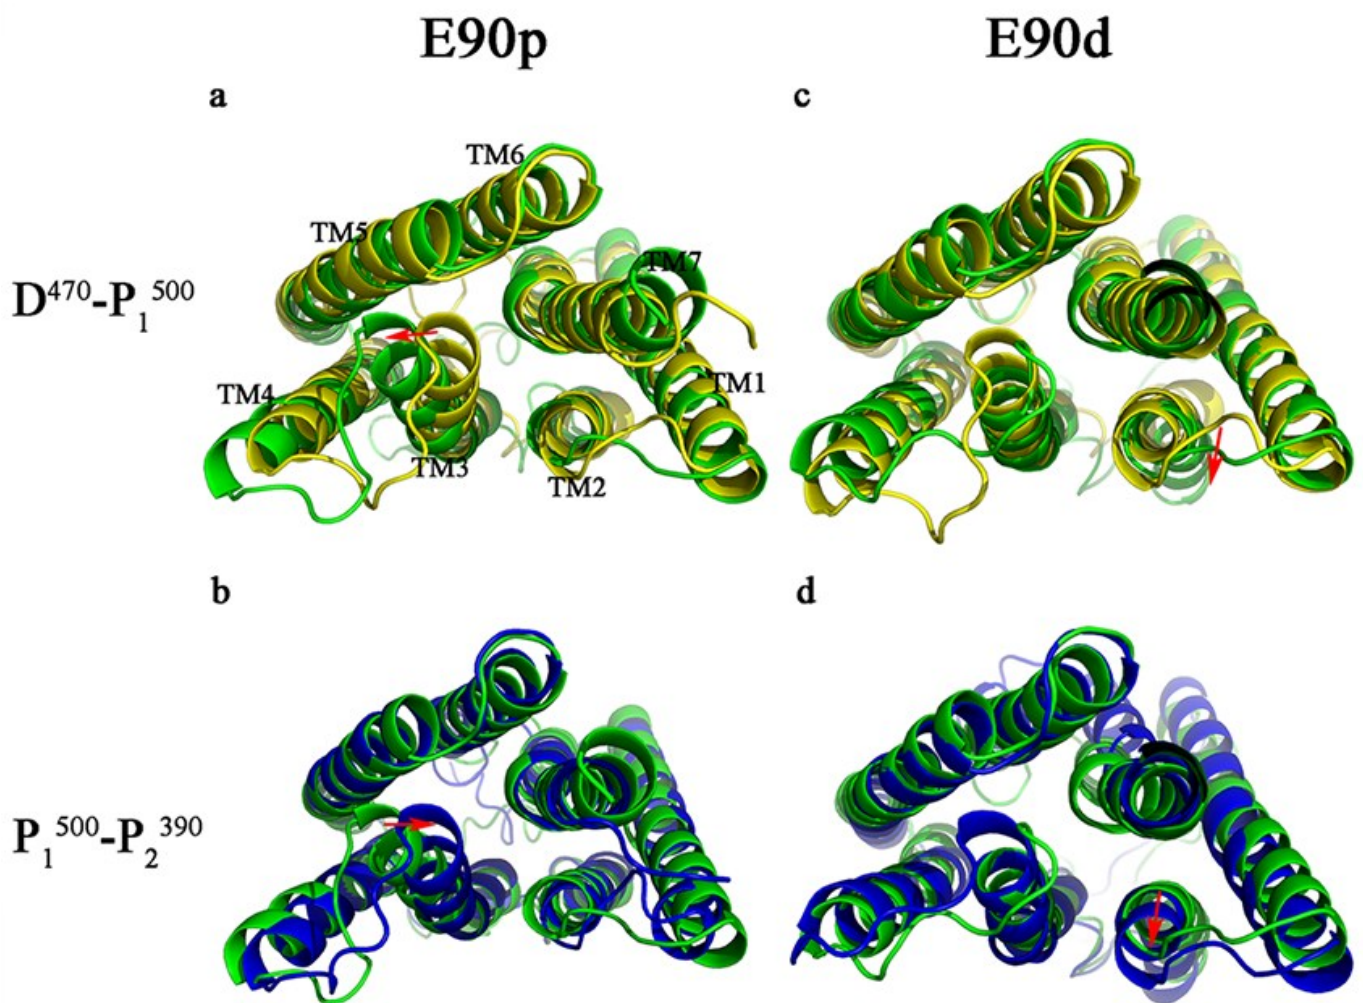

Fig. S3: The structure changes of ChR2 protein during the photocycle. (a) the superimposed conformations of  $D^{470}$  and  $E90p-P_1^{500}$ , (b) the superimposed conformations of  $E90p-P_1^{500}$  and  $E90p-P_2^{390}$ , (c) the superimposed conformations of  $D^{470}$  and  $E90d-P_1^{500}$ , (d) the superimposed conformations of  $E90d-P_1^{500}$  and  $E90d-P_2^{390}$ . The  $D^{470}$  state is displayed in yellow, the  $P_1^{500}$  state is displayed in green, and the  $P_2^{390}$  state is displayed in blue.

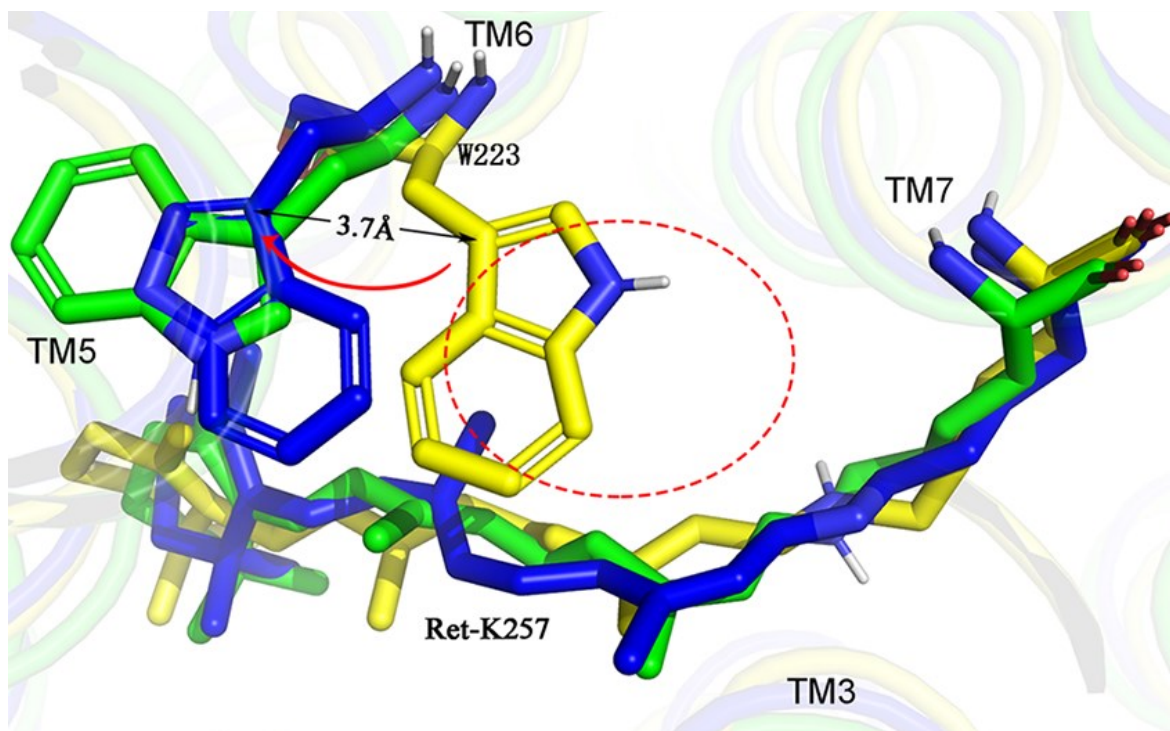

Fig. S4: The superimposed conformations of moving of the W223 residue induced by retinal isomerization. The D<sup>470</sup> state is displayed in yellow, the P<sub>1</sub><sup>500</sup> state is displayed in green, and the P<sub>2</sub><sup>390</sup> state is displayed in blue. The position of potential ion channels on the side of retinal is indicated by a red dashed ellipse.

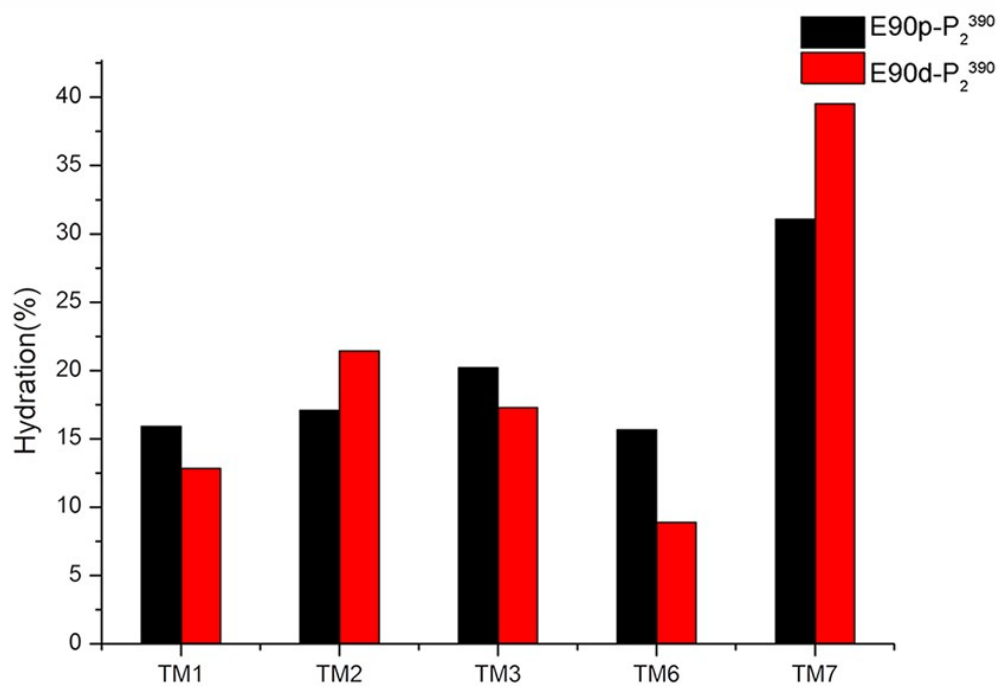

Fig. S5: Diagram of hydration degree of TM1, 2, 3, 6 and 7 in the P<sub>2</sub><sup>390</sup> state.

Tab. S1: The pKa of E90 in D<sup>470</sup>, P<sub>1</sub><sup>500</sup> and P<sub>2</sub><sup>390</sup> states.

| Intermediates | D <sup>470</sup> | P <sub>1</sub> <sup>500</sup> | P <sub>2</sub> <sup>390</sup> |
|---------------|------------------|-------------------------------|-------------------------------|
| pKa           | 8.69             | 6.45                          | 5.05                          |
